# Supplementary material
Source: MDPI journal article supplement (https://www.mdpi.com/2227-9717/9/9/1603)
Supplement: s1 [file s1 › processes-1272801-supplementary.pdf]

**Table S1.** The PCR protocol and reagents used in bacterial analysis of ewe's milk lump cheeses.

| Reagents (μl)                  | Volume (μl) |
|--------------------------------|-------------|
| Q5 High-Fidelity 2X Master Mix | 15          |
| Water                          | 9           |
| Forward primer                 | 1.5         |
| Reverse primer                 | 1.5         |
| DNA                            | 3           |

Isolated DNA was used as a template in PCR reaction targeting the hypervariable V4 region of the bacterial 16S rRNA gene (16S Metagenomic sequencing Library Preparation protocol, Illumina, USA). The PCR detection protocol was as follows: 98°C (30 seconds); 98°C (10 seconds), 55°C (15 seconds), 72°C (25 seconds), 30 cycles; 72°C (2 minutes).
